# Supplementary material
Source: PubMed Central journal article supplement (PMC2929679)
Supplement: NIHMS226403-supplement-1.pdf [file NIHMS226403-supplement-1.pdf]

## Supplemental Data

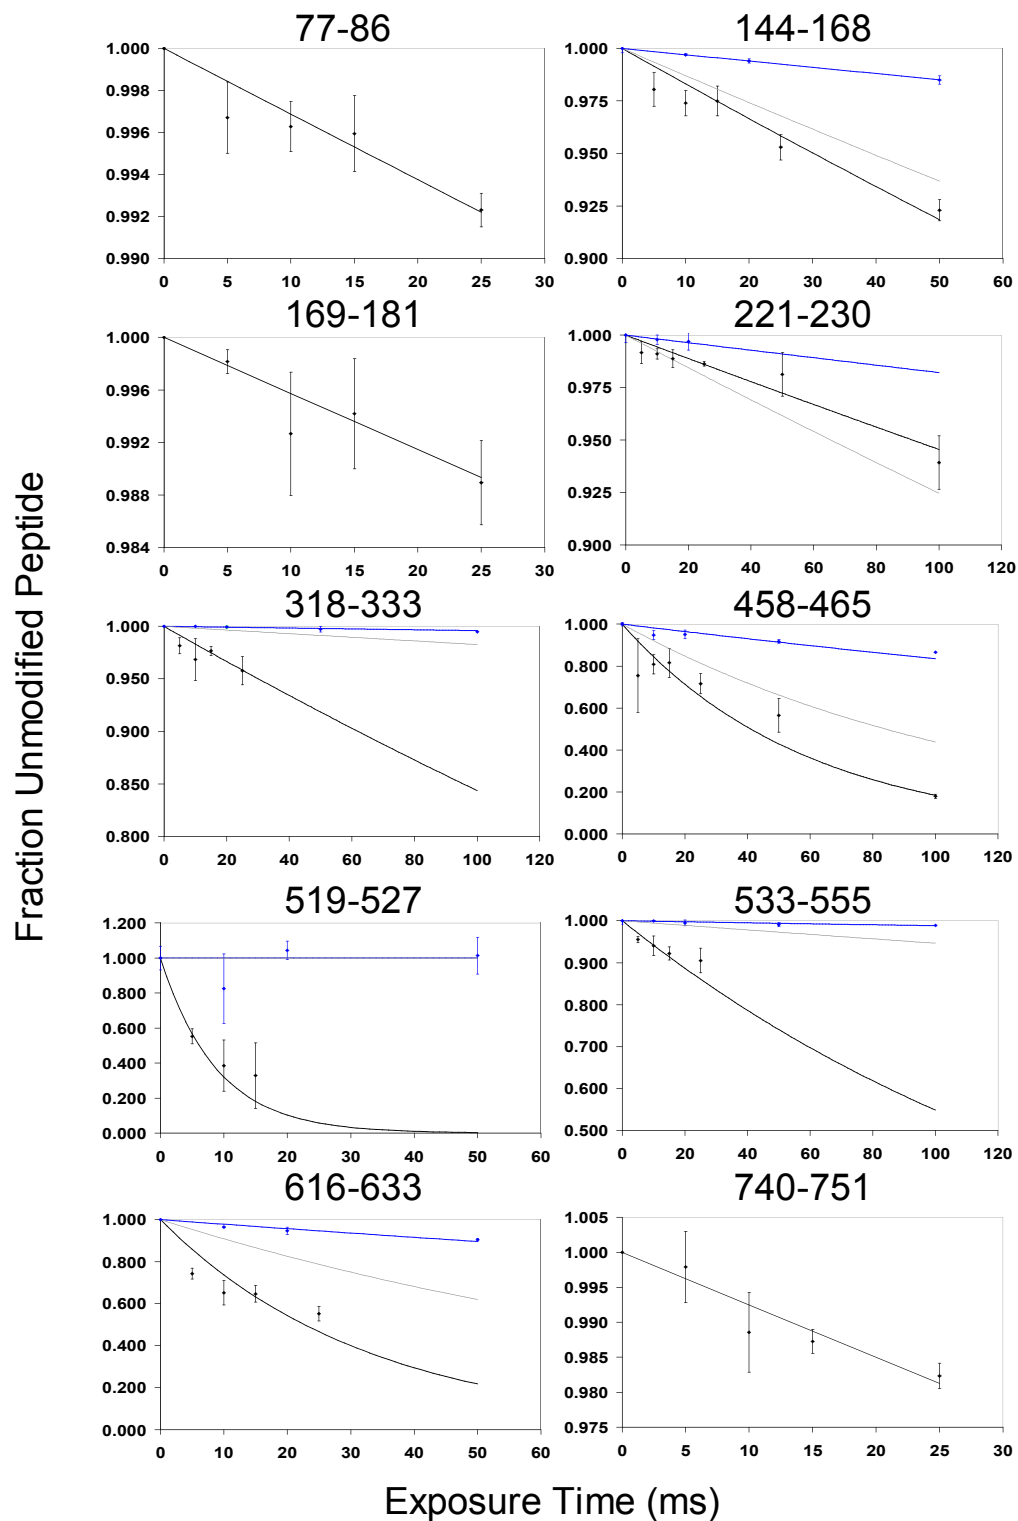

Figure S1. Dose-response curves for labeled ClpA monomer (black) and hexamer (blue) peptide modification as a function of x-ray exposure time. Grey lines indicate hexamer values normalized for the presence of ATP $\gamma$ S.

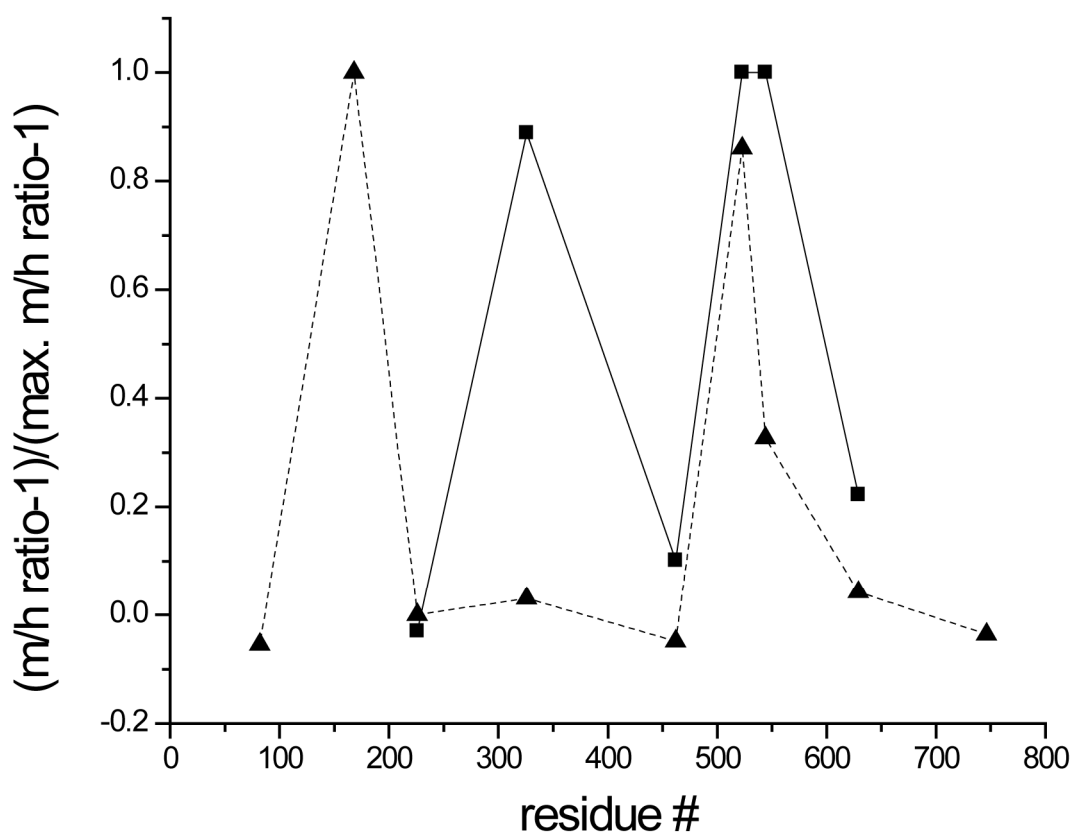

Figure S2. Relative solvent accessibilities in the monomer and hexamer states. For a given set of data, relative solvent accessibilities for the monomeric (m) and hexameric (h) states were parameterized as  $[(m/h)-1]/[(m/h)_{\max}-1]$ , where  $(m/h)_{\max}$  is the maximum monomer/hexamer ratio in the set of data. This parameterization normalizes the largest increase in protection on hexamer formation to a value of 1 and the smallest to a value of 0. For peptide 519-527, where the hexamer accessibility is too low to be measured, the parameter was set to 1. Solid line: experimental modification rates, dashed line: predicted solvent accessibilities from the monomer and hexamer structural models.

| Table S1. Calculated probe amino acid solvent accessibility values for structural models of ClpA |                          |                                          |                              |                       |                       |                 |                               |                               |                               |
|--------------------------------------------------------------------------------------------------|--------------------------|------------------------------------------|------------------------------|-----------------------|-----------------------|-----------------|-------------------------------|-------------------------------|-------------------------------|
| Amino Acid                                                                                       | Domain                   | Solvent Accessibility ( $\text{\AA}^2$ ) |                              |                       |                       |                 | Monomer/<br>Hexamer1<br>Ratio | Monomer/<br>Hexamer2<br>Ratio | Monomer/<br>FP Model<br>Ratio |
|                                                                                                  |                          | Monomer <sup>a</sup>                     | Mono $\Delta$ N <sup>b</sup> | Hexamer1 <sup>c</sup> | Hexamer2 <sup>d</sup> | FP <sup>e</sup> |                               |                               |                               |
| P80                                                                                              | N                        | 35.7                                     | n/a                          | 44.3                  | n/a                   | n/a             | 0.81                          | n/a                           | n/a                           |
| F84                                                                                              | N                        | 4.9                                      | n/a                          | 9.3                   | n/a                   | n/a             | 0.53                          | n/a                           | n/a                           |
| P147,<br>153,157                                                                                 | N-D1 loop                | n/a                                      | n/a                          | n/a                   | n/a                   | n/a             | n/a                           | n/a                           | n/a                           |
| F172                                                                                             | D1                       | 152.6                                    | 152.6                        | 40.8                  | 67.1                  | 67.1            | 3.74                          | 2.27                          | 2.27                          |
| L179                                                                                             | D1                       | 55.4                                     | 55.4                         | 36.8                  | 55.9                  | 55.9            | 1.51                          | 0.99                          | 0.99                          |
| W229                                                                                             | D1 near<br>Walker A      | 93.1                                     | 120.0                        | 85.0                  | 120.3                 | 120.3           | 1.10                          | 1.00                          | 1.00                          |
| Y324                                                                                             | D1 sensor<br>1           | 88.0                                     | 88                           | 64.8                  | 26.8                  | 26.8            | 1.36                          | 0.66                          | 3.29                          |
| M458                                                                                             | D2<br>nucleotide<br>int. | 133.7                                    | 133.7                        | 136.9                 | 56.8                  | 56.8            | 0.98                          | 1.35                          | 2.35                          |
| M521                                                                                             | D2                       | 2.1                                      | 2.1                          | 23.9                  | 2.3                   | 3.1             | 0.09                          | 0.08                          | 0.68                          |
| Y524                                                                                             | D2                       | 16.1                                     | 16.1                         | 18.0                  | 14.4                  | 12.9            | 0.90                          | 0.46                          | 1.25                          |
| M525                                                                                             | D2                       | 41.3                                     | 41.3                         | 16.2                  | 34.6                  | 48.9            | 2.55                          | 1.95                          | 0.84                          |
| P537                                                                                             | D2 loop                  | 65.9                                     | 65.9                         | 103.2                 | 66.9                  | 61.4            | 0.64                          | 0.50                          | 1.07                          |
| P538                                                                                             | D2 loop                  | 131.1                                    | 131.1                        | 32.7                  | 132.6                 | 62.2            | 4.01                          | 12.53                         | 2.11                          |
| Y540                                                                                             | D2 loop                  | 26.9                                     | 26.9                         | 19.4                  | 20.1                  | 41.8            | 1.39                          | 1.82                          | 0.64                          |
| F543                                                                                             | D2 loop                  | 97.4                                     | 97.4                         | 107.3                 | 97.7                  | 25.4            | 0.91                          | 23.19                         | 3.83                          |
| H621                                                                                             | D2 near<br>ClpP loop     | n/a                                      | n/a                          | n/a                   | n/a                   | 106.9           | n/a                           | n/a                           | n/a                           |
| M629                                                                                             | D2                       | 119.0                                    | 119.0                        | 138.5                 | 118.7                 | 118.8           | 0.86                          | 1.28                          | 1.00                          |
| Y744                                                                                             | D2 C-term                | 68.1                                     | 68.1                         | 102.6                 | 68.4                  | 68.4            | 0.66                          | 2.22                          | 1.00                          |
| F746                                                                                             | D2 C-term                | 67.1                                     | 67.1                         | 73.3                  | 64.8                  | 64.9            | 0.92                          | 1.09                          | 1.03                          |

<sup>a</sup>1KSF(Guo et al., 2002); <sup>b</sup>1KSF without N-domain; <sup>c</sup>(Guo et al., 2002); <sup>d</sup>(Hinnerwisch et al., 2005); <sup>e</sup>footprinting model. Due to the lack of N-domain in Hexamer2 and the footprinting model, the values are calculated for these models and the respective ratios without this portion of the structure for both monomer and hexamer. Amino acids P147, P153, P157 and H621 are missing from all models as they do not appear in the monomeric crystal structure (Guo et al., 2002).
